# Supplementary material for: Infections Caused by Extended-Spectrum β-Lactamase Producing Escherichia Coli in Systemic Lupus Erythematosus Patients: Prevalence, Risk Factors, and Predictive Model
Source: Hindawi journal article supplement (doi:10.1155/2018/8296720), 2018-11-18
Supplement: f1 [file 8296720.f1.pdf]

## Supplementary Materials

**Supplemental table 1:** Clinical characteristics of SLE patients with or without *E.coli* infection

**Supplemental table 2:** Multivariate logistic regression analysis of risk factors for SLE patients infected by *E.coli*

**Supplemental table 3:** The distribution of ESBL producing *E.coli*, number of risk factors of the patients and the antimicrobial susceptibility testing including: Ampicillin, Piperacillin, Ampicillin-sulbactam, Piperacillin-tazobactam, Ciprofloxacin, Levofloxacin and cefuroxime.

**Supplemental table 4:** The antimicrobial susceptibility testing of ESBL producing *E.coli* including: Ceftazidime, cefepime, Aztreonam, Amikacin, Gentamicin, Fosfomycin, Trimethoprim-sulfamethoxazole, Ertapenem, Meropenem and Imipenem.

**Supplemental table 5:** The distribution of non ESBL producing *E.coli*, number of risk factors of the patients and the antimicrobial susceptibility testing including: Ampicillin, Piperacillin, Ampicillin-sulbactam, Piperacillin-tazobactam, Ciprofloxacin, Levofloxacin and cefuroxime.

**Supplemental table 6:** The antimicrobial susceptibility testing of non ESBL producing *E.coli* including: Ceftazidime, cefepime, Aztreonam, Amikacin, Gentamicin, Fosfomycin, Trimethoprim-sulfamethoxazole, Ertapenem, Meropenem and Imipenem.

Supplementary table1. Clinical characteristics of SLE patients with or without *E.coli* infection

| Characteristics<br>(n, % / mean±SD)                            | E.coli infection<br>n=384 | Control<br>n=384 | P<br>value |
|----------------------------------------------------------------|---------------------------|------------------|------------|
| Age,yrs                                                        | 48.7±7.6                  | 48.3±7.4         | 0.460      |
| Female gender                                                  | 369 (96.1)                | 369 (96.1)       | 1.000      |
| ICU stay during hospitalization                                | 46 (11.9)                 | 12 (3.1)         | <0.001     |
| Long of hostital stay,days                                     | 10.8±4.4                  | 10.7±4.8         | 0.764      |
| Hospitalization ≥ 48 hours in preceding 90 days                | 73 (19.0)                 | 60 (15.6)        | 0.215      |
| Enterobacteriaceae colonization or infection in preceding year | 43 (11.2)                 | 6 (1.6)          | <0.001     |
| Mechanical ventilation ≥ 48 hours                              | 25 (6.5)                  | 7 (1.8)          | 0.001      |
| Deep vein catheter ≥ 48 hours                                  | 47 (12.2)                 | 33 (8.6)         | 0.098      |
| Urethral catheter ≥ 48 hours                                   | 35 (9.1)                  | 9 (2.3)          | <0.001     |
| Residence of nursing home                                      | 44 (11.5)                 | 8 (2.1)          | <0.001     |
| Mortality                                                      | 36 (9.4)                  | 7 (1.8)          | <0.001     |
| SLE activity at the time of hospitalization                    |                           |                  |            |
| Lupus nephritis                                                | 74 (19.3)                 | 22 (5.7)         | <0.001     |
| Hematological activity                                         | 33 (8.6)                  | 18 (4.7)         | 0.029      |
| Central nervous system activity                                | 10 (2.6)                  | 9 (2.3)          | 0.816      |
| Course of SLE, month                                           | 41.7±12.6                 | 41.3±12.7        | 0.451      |
| Immunosuppressive treatment                                    | 70 (18.2)                 | 49 (12.8)        | 0.036      |
| Daily prednisone dose before hospitalization                   | 21.7±5.4                  | 10.7±3.1         | <0.001     |
| Positive anti-dsDNA                                            | 258 (67.2)                | 233 (60.7)       | 0.06       |
| Low C3 levels                                                  | 254 (66.1)                | 162 (42.2)       | <0.001     |
| Lymphopenia,<1000/ml                                           | 123 (32.0)                | 109 (28.4)       | 0.271      |
| SLEDAI score                                                   | 8.7±3.6                   | 4.2±1.9          | <0.001     |

ESBL, Extended-Spectrum β-Lactamase; ICU, Intensive care unit; C3, Complement 3; SLE, Systemic lupus erythematosus; SLEDAI, Systemic Lupus Erythematosus Disease Activity Index;

Supplementary table2. Multivariate logistic regression analysis of risk factors for SLE patients infected by *E.coli*

| Variable                                                       | Adjusted OR | 95%CI      | P value |
|----------------------------------------------------------------|-------------|------------|---------|
| ICU stay during hospitalization                                | 3.19        | 1.72~8.63  | <0.001  |
| Enterobacteriaceae colonization or infection in preceding year | 6.39        | 3.96~11.72 | <0.001  |
| Mechanical ventilation $\geq$ 48 hours                         | 2.08        | 1.06~4.38  | 0.041   |
| Urethral catheter $\geq$ 48 hours                              | 2.49        | 1.32~6.74  | 0.032   |
| Residence of nursing home                                      | 1.09        | 0.51~3.38  | 0.119   |
| Lupus nephritis                                                | 3.13        | 1.88~6.02  | 0.031   |
| Low C3 levels                                                  | 3.08        | 1.07~5.82  | 0.039   |
| Immunosuppressive treatment                                    | 1.79        | 0.63~6.05  | 0.079   |
| Daily prednisone dose at the time of hospitalization           |             |            |         |
| 0mg/day                                                        | 0.66        | 0.22~1.86  | 0.439   |
| <7.5mg/day                                                     | 1.77        | 0.75~4.03  | 0.328   |
| 7.5~30mg/day                                                   | 2.56        | 1.18~7.41  | 0.038   |
| >30mg/day                                                      | 4.99        | 2.18~10.96 | 0.019   |
| SLEDAI score                                                   |             |            |         |
| 0~4                                                            | 0.59        | 0.32~1.08  | 0.062   |
| 5~9                                                            | 1.21        | 0.75~3.44  | 0.072   |
| 10~14                                                          | 3.16        | 1.15~6.08  | 0.043   |
| >15                                                            | 4.19        | 2.71~8.02  | 0.019   |

ESBL, Extended-Spectrum  $\beta$ -Lactamase; ICU, Intensive care unit; C3, Complement 3; SLE, Systemic lupus erythematosus; SLEDAI, Systemic Lupus Erythematosus Disease Activity Index;

Supplemental table 3

| Number | ESBL | Gender | Department | Sample distribution | Bacteria | Number of risks | Ampicillin | Piperacillin | Ampicillin-sulbactam | Piperacillin-tazobactam | Ciprofloxacin | Levofloxacin | cefuroxime |
|--------|------|--------|------------|---------------------|----------|-----------------|------------|--------------|----------------------|-------------------------|---------------|--------------|------------|
| 1      | +    | male   | immunology | sputum              | e. coli  | 5               | R          | R            | R                    | R                       | R             | R            | R          |
| 2      | +    | female | immunology | sputum              | e. coli  | 7               | R          | R            | S                    | S                       | R             | R            | R          |
| 3      | +    | female | immunology | sputum              | e. coli  | 7               | R          | R            | R                    | S                       | R             | R            | R          |
| 4      | +    | female | immunology | sputum              | e. coli  | 2               | R          | R            | R                    | S                       | S             | R            | R          |
| 5      | +    | female | immunology | sputum              | e. coli  | 6               | R          | R            | S                    | S                       | R             | R            | R          |
| 6      | +    | female | immunology | sputum              | e. coli  | 7               | R          | R            | R                    | R                       | R             | R            | R          |
| 7      | +    | female | immunology | sputum              | e. coli  | 5               | R          | R            | R                    | S                       | R             | R            | R          |
| 8      | +    | female | immunology | sputum              | e. coli  | 8               | R          | R            | R                    | S                       | R             | R            | R          |
| 9      | +    | female | immunology | sputum              | e. coli  | 6               | R          | R            | S                    | R                       | R             | R            | R          |
| 10     | +    | female | immunology | sputum              | e. coli  | 3               | R          | R            | R                    | S                       | R             | R            | R          |
| 11     | +    | female | immunology | sputum              | e. coli  | 7               | R          | R            | R                    | S                       | R             | R            | R          |
| 12     | +    | female | immunology | sputum              | e. coli  | 6               | R          | R            | S                    | R                       | R             | R            | R          |
| 13     | +    | female | immunology | sputum              | e. coli  | 8               | R          | R            | R                    | S                       | S             | R            | R          |
| 14     | +    | female | immunology | sputum              | e. coli  | 5               | R          | R            | R                    | S                       | R             | R            | R          |
| 15     | +    | female | immunology | sputum              | e. coli  | 7               | R          | R            | S                    | R                       | R             | R            | R          |
| 16     | +    | female | immunology | sputum              | e. coli  | 6               | R          | R            | R                    | S                       | R             | R            | R          |
| 17     | +    | female | immunology | sputum              | e. coli  | 2               | R          | R            | R                    | S                       | R             | R            | R          |
| 18     | +    | female | immunology | sputum              | e. coli  | 8               | R          | R            | S                    | S                       | R             | R            | R          |
| 19     | +    | female | immunology | sputum              | e. coli  | 9               | R          | R            | R                    | R                       | R             | R            | R          |
| 20     | +    | female | immunology | sputum              | e. coli  | 6               | R          | R            | R                    | S                       | R             | R            | R          |
| 21     | +    | female | immunology | sputum              | e. coli  | 3               | R          | R            | S                    | S                       | R             | R            | R          |
| 22     | +    | female | immunology | sputum              | e. coli  | 7               | R          | R            | R                    | R                       | R             | R            | R          |
| 23     | +    | female | immunology | sputum              | e. coli  | 9               | R          | R            | R                    | S                       | R             | R            | R          |
| 24     | +    | female | immunology | sputum              | e. coli  | 1               | R          | R            | R                    | S                       | R             | R            | R          |
| 25     | +    | female | immunology | sputum              | e. coli  | 8               | R          | R            | S                    | S                       | S             | R            | R          |
| 26     | +    | female | immunology | sputum              | e. coli  | 6               | R          | R            | R                    | S                       | R             | R            | R          |
| 27     | +    | female | immunology | sputum              | e. coli  | 8               | R          | R            | R                    | S                       | R             | R            | R          |
| 28     | +    | female | immunology | sputum              | e. coli  | 6               | R          | R            | R                    | R                       | R             | R            | R          |
| 29     | +    | female | immunology | sputum              | e. coli  | 5               | R          | R            | R                    | S                       | R             | R            | R          |
| 30     | +    | female | immunology | sputum              | e. coli  | 7               | R          | R            | S                    | S                       | R             | R            | R          |
| 31     | +    | female | immunology | sputum              | e. coli  | 6               | R          | R            | R                    | S                       | R             | R            | R          |
| 32     | +    | male   | immunology | sputum              | e. coli  | 8               | R          | R            | R                    | S                       | R             | R            | R          |
| 33     | +    | female | immunology | sputum              | e. coli  | 5               | R          | R            | R                    | R                       | R             | R            | R          |
| 34     | +    | female | immunology | sputum              | e. coli  | 8               | R          | R            | S                    | S                       | R             | R            | R          |
| 35     | +    | female | immunology | sputum              | e. coli  | 6               | R          | R            | R                    | S                       | R             | R            | R          |
| 36     | +    | female | immunology | sputum              | e. coli  | 9               | R          | R            | S                    | S                       | S             | R            | R          |
| 37     | +    | female | immunology | sputum              | e. coli  | 6               | R          | R            | R                    | S                       | R             | R            | R          |
| 38     | +    | female | immunology | sputum              | e. coli  | 8               | R          | R            | R                    | R                       | R             | R            | R          |
| 39     | +    | female | immunology | sputum              | e. coli  | 3               | R          | R            | R                    | S                       | R             | R            | R          |
| 40     | +    | female | immunology | sputum              | e. coli  | 7               | R          | R            | S                    | S                       | R             | R            | R          |
| 41     | +    | female | immunology | sputum              | e. coli  | 9               | R          | R            | R                    | S                       | R             | R            | R          |
| 42     | +    | female | immunology | sputum              | e. coli  | 5               | R          | R            | R                    | S                       | R             | R            | R          |
| 43     | +    | female | immunology | ETA                 | e. coli  | 10              | R          | R            | S                    | R                       | R             | R            | R          |
| 44     | +    | female | immunology | ETA                 | e. coli  | 6               | R          | R            | R                    | S                       | R             | R            | R          |
| 45     | +    | female | immunology | ETA                 | e. coli  | 9               | R          | R            | R                    | S                       | R             | R            | R          |
| 46     | +    | female | immunology | ETA                 | e. coli  | 7               | R          | R            | R                    | R                       | S             | R            | R          |
| 47     | +    | female | immunology | ETA                 | e. coli  | 5               | R          | R            | S                    | S                       | R             | R            | R          |
| 48     | +    | female | immunology | ETA                 | e. coli  | 10              | R          | R            | R                    | S                       | R             | R            | R          |
| 49     | +    | female | immunology | ETA                 | e. coli  | 6               | R          | R            | R                    | R                       | R             | R            | R          |
| 50     | +    | female | immunology | ETA                 | e. coli  | 9               | R          | R            | R                    | S                       | R             | R            | R          |
| 51     | +    | female | immunology | ETA                 | e. coli  | 6               | R          | R            | S                    | S                       | R             | R            | R          |
| 52     | +    | female | immunology | ETA                 | e. coli  | 1               | R          | R            | R                    | S                       | R             | R            | R          |
| 53     | +    | female | immunology | ETA                 | e. coli  | 9               | R          | R            | R                    | S                       | R             | R            | R          |
| 54     | +    | female | immunology | ETA                 | e. coli  | 6               | R          | R            | R                    | S                       | R             | R            | R          |
| 55     | +    | female | immunology | ETA                 | e. coli  | 6               | R          | R            | S                    | S                       | R             | R            | R          |
| 56     | +    | male   | immunology | ETA                 | e. coli  | 10              | R          | R            | R                    | S                       | R             | R            | R          |
| 57     | +    | female | immunology | BALF                | e. coli  | 5               | R          | R            | R                    | S                       | R             | R            | R          |
| 58     | +    | female | immunology | BALF                | e. coli  | 7               | R          | R            | S                    | R                       | R             | R            | R          |

|     |   |        |            |       |         |    |   |   |   |   |   |   |   |
|-----|---|--------|------------|-------|---------|----|---|---|---|---|---|---|---|
| 59  | + | female | immunology | BALF  | e. coli | 7  | R | R | R | S | S | R | R |
| 60  | + | female | immunology | BALF  | e. coli | 10 | R | R | R | S | R | R | R |
| 61  | + | female | immunology | BALF  | e. coli | 3  | R | R | S | S | R | R | R |
| 62  | + | female | immunology | BALF  | e. coli | 7  | R | R | R | S | R | R | R |
| 63  | + | female | immunology | BALF  | e. coli | 10 | R | R | R | S | R | R | R |
| 64  | + | female | immunology | BALF  | e. coli | 7  | R | R | R | S | R | R | R |
| 65  | + | female | immunology | BALF  | e. coli | 5  | R | R | S | S | R | R | R |
| 66  | + | female | immunology | BALF  | e. coli | 10 | R | R | R | R | R | R | R |
| 67  | + | female | immunology | BALF  | e. coli | 7  | R | R | R | S | R | R | R |
| 68  | + | female | immunology | BALF  | e. coli | 2  | R | R | R | S | R | R | R |
| 69  | + | female | immunology | BALF  | e. coli | 7  | R | R | S | S | R | R | R |
| 70  | + | female | immunology | BALF  | e. coli | 10 | R | R | R | S | S | R | R |
| 71  | + | female | immunology | BALF  | e. coli | 5  | R | R | R | S | R | R | R |
| 72  | + | female | immunology | BALF  | e. coli | 7  | R | R | R | S | R | R | R |
| 73  | + | female | immunology | BALF  | e. coli | 6  | R | R | R | S | R | R | R |
| 74  | + | female | immunology | BALF  | e. coli | 4  | R | R | R | S | R | R | R |
| 75  | + | female | immunology | BALF  | e. coli | 11 | R | R | R | R | R | R | R |
| 76  | + | female | immunology | BALF  | e. coli | 11 | R | R | S | S | R | R | R |
| 77  | + | female | immunology | Urine | e. coli | 5  | R | R | R | S | R | R | R |
| 78  | + | female | immunology | Urine | e. coli |    | R | R | R | S | R | R | R |
| 79  | + | female | immunology | Urine | e. coli | 3  | R | R | R | S | R | R | R |
| 80  | + | female | immunology | Urine | e. coli | 11 | R | R | S | S | R | R | R |
| 81  | + | female | immunology | Urine | e. coli | 4  | R | R | R | S | S | R | R |
| 82  | + | female | immunology | Urine | e. coli | 9  | R | R | R | R | R | R | R |
| 83  | + | female | immunology | Urine | e. coli | 9  | R | R | R | S | R | R | R |
| 84  | + | female | immunology | Urine | e. coli | 4  | R | R | S | S | R | R | R |
| 85  | + | female | immunology | Urine | e. coli | 7  | R | R | R | S | R | R | R |
| 86  | + | female | immunology | Urine | e. coli | 9  | R | R | R | S | R | R | R |
| 87  | + | female | immunology | Urine | e. coli | 6  | R | R | R | S | R | R | R |
| 88  | + | female | immunology | Urine | e. coli | 9  | R | R | S | S | R | R | R |
| 89  | + | female | immunology | Urine | e. coli | 4  | R | R | R | R | R | R | R |
| 90  | + | female | immunology | Urine | e. coli | 9  | R | R | R | S | R | R | R |
| 91  | + | female | immunology | Urine | e. coli | 6  | R | R | R | S | R | R | R |
| 92  | + | female | immunology | Urine | e. coli | 9  | R | R | R | S | R | R | R |
| 93  | + | female | immunology | Urine | e. coli | 3  | R | R | S | S | S | R | R |
| 94  | + | female | immunology | Urine | e. coli | 9  | R | R | R | S | R | R | R |
| 95  | + | female | immunology | Urine | e. coli | 5  | R | R | R | S | R | R | R |
| 96  | + | female | immunology | Urine | e. coli | 9  | R | R | R | R | R | R | R |
| 97  | + | female | immunology | Urine | e. coli | 7  | R | R | R | S | R | R | R |
| 98  | + | female | immunology | Urine | e. coli | 9  | R | R | R | S | R | R | R |
| 99  | + | female | immunology | Urine | e. coli | 1  | R | R | S | S | R | R | R |
| 100 | + | female | immunology | Urine | e. coli | 7  | R | R | R | S | R | R | R |
| 101 | + | female | immunology | Urine | e. coli | 3  | R | R | R | S | R | R | R |
| 102 | + | female | immunology | Urine | e. coli | 7  | R | R | R | S | R | R | R |
| 103 | + | female | immunology | Urine | e. coli | 6  | R | R | R | R | R | R | R |
| 104 | + | female | immunology | Urine | e. coli | 5  | R | R | R | S | R | R | R |
| 105 | + | female | immunology | Urine | e. coli | 8  | R | R | R | S | S | R | R |
| 106 | + | female | immunology | Urine | e. coli | 6  | R | R | R | S | R | R | R |
| 107 | + | female | immunology | Urine | e. coli | 7  | R | R | R | R | R | R | R |
| 108 | + | female | immunology | Urine | e. coli | 3  | R | R | R | S | R | R | R |
| 109 | + | female | immunology | Urine | e. coli | 9  | R | R | R | S | R | R | R |
| 110 | + | female | immunology | Urine | e. coli | 6  | R | R | R | S | R | R | R |
| 111 | + | female | immunology | Urine | e. coli | 8  | R | R | R | S | R | R | R |
| 112 | + | female | immunology | Urine | e. coli | 5  | R | R | R | R | R | R | R |
| 113 | + | female | immunology | Urine | e. coli | 7  | R | R | R | S | R | R | R |
| 114 | + | female | immunology | Urine | e. coli | 9  | R | R | R | S | R | R | R |
| 115 | + | female | immunology | Urine | e. coli | 3  | R | R | R | S | R | R | R |
| 116 | + | female | immunology | Urine | e. coli | 8  | R | R | R | S | S | R | R |
| 117 | + | female | immunology | Urine | e. coli | 5  | R | R | R | S | R | R | R |
| 118 | + | female | immunology | Urine | e. coli | 7  | R | R | R | R | R | R | R |
| 119 | + | female | immunology | Urine | e. coli | 6  | R | R | R | S | R | R | R |

|     |   |        |            |                 |         |   |   |   |   |   |   |   |   |
|-----|---|--------|------------|-----------------|---------|---|---|---|---|---|---|---|---|
| 120 | + | male   | immunology | Urine           | e. coli | 9 | R | R | R | S | R | R | R |
| 121 | + | female | immunology | Urine           | e. coli | 7 | R | R | R | S | R | R | R |
| 122 | + | female | immunology | Urine           | e. coli | 5 | R | R | R | S | R | R | R |
| 123 | + | female | immunology | Urine           | e. coli | 8 | R | R | R | S | R | R | R |
| 124 | + | female | immunology | Urine           | e. coli | 8 | R | R | R | R | R | R | R |
| 125 | + | female | immunology | Urine           | e. coli | 4 | R | R | R | S | R | R | R |
| 126 | + | female | immunology | Urine           | e. coli | 9 | R | R | R | S | R | R | R |
| 127 | + | female | immunology | Urine           | e. coli | 5 | R | R | R | S | R | R | R |
| 128 | + | female | immunology | Urine           | e. coli | 4 | R | R | R | S | S | R | R |
| 129 | + | female | immunology | Urine           | e. coli | 8 | R | R | R | S | R | R | R |
| 130 | + | female | immunology | Urine           | e. coli | 6 | R | R | R | R | R | R | R |
| 131 | + | female | immunology | Urine           | e. coli | 6 | R | R | R | S | R | R | R |
| 132 | + | female | immunology | Urine           | e. coli | 7 | R | R | R | S | R | R | R |
| 133 | + | female | immunology | Urine           | e. coli | 4 | R | R | R | S | R | R | R |
| 134 | + | female | immunology | Urine           | e. coli | 7 | R | R | R | S | R | R | R |
| 135 | + | female | immunology | Urine           | e. coli | 6 | R | R | R | R | R | R | R |
| 136 | + | female | immunology | Urine           | e. coli | 8 | R | R | R | S | R | R | R |
| 137 | + | female | immunology | Urine           | e. coli | 4 | R | R | R | S | R | R | R |
| 138 | + | female | immunology | Urine           | e. coli | 7 | R | R | R | S | R | R | R |
| 139 | + | female | immunology | Urine           | e. coli | 5 | R | R | R | S | S | R | R |
| 140 | + | female | immunology | Urine           | e. coli | 7 | R | R | R | S | R | R | R |
| 141 | + | female | immunology | Urine           | e. coli | 8 | R | R | R | R | R | R | R |
| 142 | + | female | immunology | Urine           | e. coli | 7 | R | R | R | S | R | R | R |
| 143 | + | female | immunology | Urine           | e. coli | 4 | R | R | R | S | R | R | R |
| 144 | + | female | immunology | Urine           | e. coli | 6 | R | R | R | S | R | R | R |
| 145 | + | female | immunology | Urine           | e. coli | 7 | R | R | R | R | R | R | R |
| 146 | + | female | immunology | Urine           | e. coli | 5 | R | R | R | S | R | R | R |
| 147 | + | female | immunology | Urine           | e. coli | 8 | R | R | R | S | R | R | R |
| 148 | + | female | immunology | Urine           | e. coli | 4 | R | R | R | S | S | R | R |
| 149 | + | female | immunology | Urine           | e. coli | 7 | R | R | R | S | R | R | R |
| 150 | + | female | immunology | Urine           | e. coli | 6 | R | R | R | R | R | R | R |
| 151 | + | female | immunology | Urine           | e. coli | 6 | R | R | R | S | R | R | R |
| 152 | + | female | immunology | Urine           | e. coli | 8 | R | R | R | S | R | R | R |
| 153 | + | female | immunology | Urine           | e. coli | 2 | R | R | R | S | R | R | R |
| 154 | + | female | immunology | Urine           | e. coli | 8 | R | R | R | S | R | R | R |
| 155 | + | female | immunology | Urine           | e. coli | 7 | R | R | R | R | R | R | R |
| 156 | + | female | immunology | Urine           | e. coli | 8 | R | R | R | S | R | R | R |
| 157 | + | female | immunology | Urine           | e. coli | 4 | R | R | R | S | R | R | R |
| 158 | + | female | immunology | Urine           | e. coli | 7 | R | R | R | S | R | R | R |
| 159 | + | female | immunology | Urine           | e. coli | 6 | R | R | R | R | R | R | R |
| 160 | + | female | immunology | Urine           | e. coli | 6 | R | R | R | S | S | R | R |
| 161 | + | female | immunology | Urine           | e. coli | 7 | R | R | R | S | R | R | R |
| 162 | + | female | immunology | Urine           | e. coli | 7 | R | R | R | S | R | R | R |
| 163 | + | female | immunology | Urine           | e. coli | 4 | R | R | R | S | R | R | R |
| 164 | + | female | immunology | Urine           | e. coli | 6 | R | R | R | R | R | R | R |
| 165 | + | female | immunology | Urine           | e. coli | 7 | R | R | R | S | R | R | R |
| 166 | + | female | immunology | Urine           | e. coli | 7 | R | R | R | S | R | R | R |
| 167 | + | female | immunology | Urine           | e. coli | 2 | R | R | R | S | R | R | R |
| 168 | + | female | immunology | Urine           | e. coli | 8 | R | R | R | S | R | R | R |
| 169 | + | female | immunology | Urine           | e. coli | 6 | R | R | R | R | R | R | R |
| 170 | + | female | immunology | Urine           | e. coli | 5 | R | R | R | S | S | R | R |
| 171 | + | female | immunology | Wound secretion | e. coli | 7 | R | R | R | S | R | R | R |
| 172 | + | female | immunology | Wound secretion | e. coli | 4 | R | R | R | S | R | R | R |
| 173 | + | female | immunology | Wound secretion | e. coli | 7 | R | R | R | S | R | R | R |
| 174 | + | female | immunology | Wound secretion | e. coli | 6 | R | R | R | R | R | R | R |
| 175 | + | female | immunology | Wound secretion | e. coli | 8 | R | R | R | S | R | R | R |
| 176 | + | female | immunology | Wound secretion | e. coli | 6 | R | R | R | S | R | R | R |
| 177 | + | female | immunology | Wound secretion | e. coli | 8 | R | R | R | S | R | R | R |
| 178 | + | female | immunology | Wound secretion | e. coli | 6 | R | R | R | S | R | R | R |
| 179 | + | female | immunology | Wound secretion | e. coli | 5 | R | R | R | R | R | R | R |
| 180 | + | female | immunology | Wound secretion | e. coli | 7 | R | R | R | S | S | R | R |

|     |   |        |            |       |         |   |   |   |   |   |   |   |   |
|-----|---|--------|------------|-------|---------|---|---|---|---|---|---|---|---|
| 181 | + | female | immunology | Pus   | e. coli | 7 | R | R | R | S | R | R | R |
| 182 | + | female | immunology | Pus   | e. coli | 4 | R | R | R | S | R | R | R |
| 183 | + | female | immunology | Pus   | e. coli | 7 | R | R | R | S | R | R | R |
| 184 | + | female | immunology | Pus   | e. coli | 8 | R | R | R | R | R | R | R |
| 185 | + | female | immunology | Blood | e. coli | 5 | R | R | R | S | R | R | R |
| 186 | + | female | immunology | Blood | e. coli | 7 | R | R | R | S | R | R | R |
| 187 | + | female | immunology | Blood | e. coli | 6 | R | R | R | S | R | R | R |
| 188 | + | female | immunology | Blood | e. coli | 4 | R | R | R | R | R | R | R |
| 189 | + | female | immunology | Blood | e. coli | 8 | R | R | R | S | R | R | R |
| 190 | + | female | immunology | Blood | e. coli | 8 | R | R | R | S | R | R | R |
| 191 | + | female | immunology | Blood | e. coli | 4 | R | R | R | S | R | R | R |
| 192 | + | female | immunology | Blood | e. coli | 8 | R | R | R | S | R | R | R |
| 193 | + | female | immunology | Blood | e. coli | 6 | R | R | R | R | S | R | R |
| 194 | + | female | immunology | Blood | e. coli | 7 | R | R | R | S | R | R | R |
| 195 | + | female | immunology | Blood | e. coli | 9 | R | R | R | S | R | R | R |
| 196 | + | female | immunology | Blood | e. coli | 3 | R | R | R | S | R | R | R |
| 197 | + | male   | immunology | Blood | e. coli | 6 | R | R | R | S | R | R | R |
| 198 | + | female | immunology | Blood | e. coli | 6 | R | R | R | S | R | R | R |
| 199 | + | female | immunology | Blood | e. coli | 7 | R | R | R | S | R | R | R |
| 200 | + | female | immunology | Blood | e. coli | 4 | R | R | R | S | R | R | R |
| 201 | + | female | immunology | Blood | e. coli | 8 | R | R | R | S | R | R | R |
| 202 | + | male   | immunology | Blood | e. coli | 5 | R | R | R | S | R | R | R |
| 203 | + | female | immunology | Blood | e. coli | 7 | R | R | R | S | S | R | R |
| 204 | + | female | immunology | Blood | e. coli | 7 | R | R | R | S | R | R | R |
| 205 | + | female | immunology | Blood | e. coli | 3 | R | R | R | S | R | R | R |
| 206 | + | female | immunology | Blood | e. coli | 6 | R | R | R | S | R | R | R |
| 207 | + | female | immunology | Blood | e. coli | 7 | R | R | R | S | R | R | R |
| 208 | + | female | immunology | Blood | e. coli | 8 | R | R | R | S | R | R | R |
| 209 | + | female | immunology | Blood | e. coli | 2 | R | R | R | S | R | R | R |
| 210 | + | female | immunology | Blood | e. coli | 7 | R | R | R | S | R | R | R |
| 211 | + | female | immunology | Blood | e. coli | 6 | R | R | R | S | S | R | R |
| 212 | + | female | immunology | Blood | e. coli | 3 | R | R | R | S | R | S | S |

Supplemental table 4

| Number | ESBL | Gender | Department | Sample distribution | Bacteria | ceftazidime | cefepime | Aztreonam | Amikacin | Gentamicin | Fosfomycin | Trimethoprim-sulfamethoxazole | Ertapenem | Meropenem | Imipenem |
|--------|------|--------|------------|---------------------|----------|-------------|----------|-----------|----------|------------|------------|-------------------------------|-----------|-----------|----------|
| 1      | +    | male   | immunology | sputum              | e. coli  | S           | R        | S         | S        | S          | S          | S                             | R         | S         | S        |
| 2      | +    | female | immunology | sputum              | e. coli  | R           | S        | R         | S        | R          | R          | R                             | S         | S         | S        |
| 3      | +    | female | immunology | sputum              | e. coli  | R           | R        | S         | R        | R          | S          | S                             | S         | S         | S        |
| 4      | +    | female | immunology | sputum              | e. coli  | S           | S        | R         | S        | S          | R          | S                             | S         | S         | S        |
| 5      | +    | female | immunology | sputum              | e. coli  | R           | S        | S         | S        | R          | S          | R                             | R         | S         | S        |
| 6      | +    | female | immunology | sputum              | e. coli  | R           | S        | R         | S        | S          | S          | S                             | S         | S         | S        |
| 7      | +    | female | immunology | sputum              | e. coli  | S           | R        | S         | S        | R          | S          | R                             | S         | S         | S        |
| 8      | +    | female | immunology | sputum              | e. coli  | R           | R        | R         | S        | S          | R          | S                             | R         | S         | S        |
| 9      | +    | female | immunology | sputum              | e. coli  | R           | R        | S         | R        | R          | S          | R                             | S         | S         | S        |
| 10     | +    | female | immunology | sputum              | e. coli  | R           | S        | R         | S        | R          | S          | S                             | R         | S         | S        |
| 11     | +    | female | immunology | sputum              | e. coli  | S           | R        | S         | S        | R          | S          | R                             | S         | S         | S        |
| 12     | +    | female | immunology | sputum              | e. coli  | R           | R        | R         | S        | S          | R          | S                             | S         | S         | S        |
| 13     | +    | female | immunology | sputum              | e. coli  | R           | R        | S         | S        | R          | S          | R                             | S         | S         | S        |
| 14     | +    | female | immunology | sputum              | e. coli  | R           | S        | R         | S        | S          | S          | S                             | R         | R         | R        |
| 15     | +    | female | immunology | sputum              | e. coli  | S           | R        | S         | S        | R          | S          | R                             | S         | S         | S        |
| 16     | +    | female | immunology | sputum              | e. coli  | R           | S        | R         | S        | R          | R          | R                             | S         | S         | S        |
| 17     | +    | female | immunology | sputum              | e. coli  | R           | R        | S         | S        | R          | S          | R                             | R         | S         | S        |
| 18     | +    | female | immunology | sputum              | e. coli  | S           | R        | R         | S        | S          | S          | R                             | S         | S         | S        |
| 19     | +    | female | immunology | sputum              | e. coli  | R           | S        | S         | R        | R          | S          | S                             | S         | S         | S        |
| 20     | +    | female | immunology | sputum              | e. coli  | R           | R        | R         | S        | S          | S          | R                             | S         | S         | S        |
| 21     | +    | female | immunology | sputum              | e. coli  | R           | R        | S         | S        | S          | R          | R                             | R         | S         | S        |
| 22     | +    | female | immunology | sputum              | e. coli  | S           | R        | S         | S        | R          | S          | S                             | S         | S         | S        |
| 23     | +    | female | immunology | sputum              | e. coli  | R           | S        | R         | S        | S          | S          | R                             | S         | S         | S        |
| 24     | +    | female | immunology | sputum              | e. coli  | S           | R        | R         | S        | R          | R          | S                             | S         | S         | S        |
| 25     | +    | female | immunology | sputum              | e. coli  | R           | R        | S         | S        | S          | R          | R                             | S         | S         | S        |
| 26     | +    | female | immunology | sputum              | e. coli  | R           | R        | R         | R        | R          | S          | S                             | S         | S         | S        |
| 27     | +    | female | immunology | sputum              | e. coli  | R           | S        | R         | S        | R          | S          | R                             | R         | S         | S        |
| 28     | +    | female | immunology | sputum              | e. coli  | S           | R        | S         | S        | R          | S          | S                             | S         | S         | S        |
| 29     | +    | female | immunology | sputum              | e. coli  | R           | R        | R         | S        | R          | S          | R                             | S         | S         | S        |
| 30     | +    | female | immunology | sputum              | e. coli  | R           | R        | R         | S        | S          | R          | R                             | S         | S         | S        |
| 31     | +    | female | immunology | sputum              | e. coli  | R           | S        | S         | S        | R          | S          | S                             | R         | S         | S        |
| 32     | +    | male   | immunology | sputum              | e. coli  | S           | R        | R         | R        | R          | S          | R                             | S         | S         | S        |
| 33     | +    | female | immunology | sputum              | e. coli  | R           | R        | R         | S        | R          | S          | R                             | S         | S         | S        |
| 34     | +    | female | immunology | sputum              | e. coli  | R           | R        | S         | S        | S          | R          | S                             | R         | S         | S        |
| 35     | +    | female | immunology | sputum              | e. coli  | S           | R        | R         | S        | R          | S          | R                             | S         | S         | S        |
| 36     | +    | female | immunology | sputum              | e. coli  | R           | S        | R         | S        | S          | S          | R                             | S         | S         | S        |
| 37     | +    | female | immunology | sputum              | e. coli  | S           | R        | S         | S        | R          | S          | S                             | S         | S         | S        |
| 38     | +    | female | immunology | sputum              | e. coli  | R           | R        | R         | R        | R          | S          | R                             | S         | S         | S        |
| 39     | +    | female | immunology | sputum              | e. coli  | R           | S        | R         | S        | S          | R          | R                             | R         | R         | R        |
| 40     | +    | female | immunology | sputum              | e. coli  | S           | R        | S         | S        | R          | S          | S                             | S         | S         | S        |
| 41     | +    | female | immunology | sputum              | e. coli  | R           | S        | R         | S        | S          | S          | R                             | S         | S         | S        |
| 42     | +    | female | immunology | sputum              | e. coli  | S           | S        | R         | S        | R          | R          | R                             | S         | S         | S        |
| 43     | +    | female | immunology | ETA                 | e. coli  | R           | R        | S         | S        | S          | S          | S                             | R         | S         | S        |
| 44     | +    | female | immunology | ETA                 | e. coli  | S           | R        | R         | S        | S          | S          | R                             | S         | S         | S        |
| 45     | +    | female | immunology | ETA                 | e. coli  | R           | S        | R         | R        | R          | S          | R                             | S         | S         | S        |
| 46     | +    | female | immunology | ETA                 | e. coli  | R           | R        | S         | S        | R          | S          | S                             | R         | S         | S        |
| 47     | +    | female | immunology | ETA                 | e. coli  | S           | R        | R         | S        | S          | R          | R                             | S         | S         | S        |
| 48     | +    | female | immunology | ETA                 | e. coli  | R           | R        | S         | S        | R          | S          | S                             | S         | S         | S        |
| 49     | +    | female | immunology | ETA                 | e. coli  | R           | S        | S         | S        | S          | R          | R                             | S         | S         | S        |
| 50     | +    | female | immunology | ETA                 | e. coli  | R           | R        | R         | R        | R          | S          | R                             | S         | S         | S        |
| 51     | +    | female | immunology | ETA                 | e. coli  | S           | R        | R         | S        | R          | R          | S                             | S         | S         | S        |
| 52     | +    | female | immunology | ETA                 | e. coli  | R           | S        | S         | S        | R          | S          | R                             | S         | S         | S        |
| 53     | +    | female | immunology | ETA                 | e. coli  | R           | R        | R         | S        | R          | R          | R                             | R         | S         | S        |
| 54     | +    | female | immunology | ETA                 | e. coli  | S           | R        | R         | S        | S          | S          | S                             | S         | S         | S        |
| 55     | +    | female | immunology | ETA                 | e. coli  | R           | S        | R         | S        | R          | R          | R                             | S         | S         | S        |
| 56     | +    | male   | immunology | ETA                 | e. coli  | R           | R        | S         | S        | S          | S          | R                             | S         | S         | S        |
| 57     | +    | female | immunology | BALF                | e. coli  | R           | R        | R         | R        | R          | R          | S                             | S         | S         | S        |
| 58     | +    | female | immunology | BALF                | e. coli  | S           | R        | R         | S        | S          | S          | R                             | R         | S         | S        |



|     |   |        |            |       |         |   |   |   |   |   |   |   |   |   |   |
|-----|---|--------|------------|-------|---------|---|---|---|---|---|---|---|---|---|---|
| 59  | + | female | immunology | BALF  | e. coli | R | S | S | S | S | R | S | S | S | S |
| 60  | + | female | immunology | BALF  | e. coli | R | R | R | S | R | S | R | S | S | S |
| 61  | + | female | immunology | BALF  | e. coli | R | R | R | S | S | S | R | S | S | S |
| 62  | + | female | immunology | BALF  | e. coli | S | S | S | S | R | R | S | S | S | S |
| 63  | + | female | immunology | BALF  | e. coli | R | R | R | S | S | S | R | R | S | S |
| 64  | + | female | immunology | BALF  | e. coli | S | S | R | R | R | R | R | S | S | S |
| 65  | + | female | immunology | BALF  | e. coli | R | R | R | S | R | R | S | S | S | S |
| 66  | + | female | immunology | BALF  | e. coli | R | R | S | S | S | R | R | S | S | S |
| 67  | + | female | immunology | BALF  | e. coli | S | S | R | S | R | S | S | S | S | S |
| 68  | + | female | immunology | BALF  | e. coli | R | R | R | S | S | S | R | R | R | R |
| 69  | + | female | immunology | BALF  | e. coli | R | R | S | S | R | R | R | S | S | S |
| 70  | + | female | immunology | BALF  | e. coli | R | S | R | S | S | R | S | S | S | S |
| 71  | + | female | immunology | BALF  | e. coli | S | R | R | S | R | S | R | R | S | S |
| 72  | + | female | immunology | BALF  | e. coli | R | R | R | R | R | S | S | S | S | S |
| 73  | + | female | immunology | BALF  | e. coli | S | S | S | S | S | R | R | S | S | S |
| 74  | + | female | immunology | BALF  | e. coli | R | R | R | S | R | S | R | S | S | S |
| 75  | + | female | immunology | BALF  | e. coli | R | R | R | S | S | S | S | R | S | S |
| 76  | + | female | immunology | BALF  | e. coli | S | S | S | S | R | R | R | S | S | S |
| 77  | + | female | immunology | Urine | e. coli | R | R | R | S | R | S | R | S | S | S |
| 78  | + | female | immunology | Urine | e. coli | R | R | S | S | S | R | R | S | S | S |
| 79  | + | female | immunology | Urine | e. coli | R | S | R | R | R | S | S | S | S | S |
| 80  | + | female | immunology | Urine | e. coli | R | R | R | S | R | S | R | S | S | S |
| 81  | + | female | immunology | Urine | e. coli | R | R | R | S | S | R | S | R | S | S |
| 82  | + | female | immunology | Urine | e. coli | S | S | S | S | R | S | R | S | S | S |
| 83  | + | female | immunology | Urine | e. coli | R | R | R | S | R | R | R | S | S | S |
| 84  | + | female | immunology | Urine | e. coli | R | R | R | S | R | S | S | S | S | S |
| 85  | + | female | immunology | Urine | e. coli | R | R | S | S | S | R | R | S | S | S |
| 86  | + | female | immunology | Urine | e. coli | S | S | R | S | R | S | R | R | S | S |
| 87  | + | female | immunology | Urine | e. coli | R | R | S | S | S | S | S | S | S | S |
| 88  | + | female | immunology | Urine | e. coli | R | S | R | R | R | S | R | S | S | S |
| 89  | + | female | immunology | Urine | e. coli | R | S | S | S | R | R | R | S | S | S |
| 90  | + | female | immunology | Urine | e. coli | R | R | R | S | S | S | S | R | S | S |
| 91  | + | female | immunology | Urine | e. coli | R | S | R | S | R | R | R | S | S | S |
| 92  | + | female | immunology | Urine | e. coli | R | R | S | S | S | S | S | S | S | S |
| 93  | + | female | immunology | Urine | e. coli | R | S | R | S | R | S | R | S | S | S |
| 94  | + | female | immunology | Urine | e. coli | R | R | R | S | R | S | S | S | S | S |
| 95  | + | female | immunology | Urine | e. coli | R | S | R | S | S | S | R | S | S | S |
| 96  | + | female | immunology | Urine | e. coli | S | S | S | S | R | R | S | R | R | R |
| 97  | + | female | immunology | Urine | e. coli | R | R | R | S | R | S | R | S | S | S |
| 98  | + | female | immunology | Urine | e. coli | R | S | R | S | S | S | R | S | S | S |
| 99  | + | female | immunology | Urine | e. coli | R | R | S | S | S | R | R | S | S | S |
| 100 | + | female | immunology | Urine | e. coli | R | R | S | R | R | S | S | S | S | S |
| 101 | + | female | immunology | Urine | e. coli | R | S | R | S | S | R | R | S | S | S |
| 102 | + | female | immunology | Urine | e. coli | R | R | R | S | R | S | R | S | S | S |
| 103 | + | female | immunology | Urine | e. coli | R | R | S | S | R | S | R | S | S | S |
| 104 | + | female | immunology | Urine | e. coli | R | R | S | S | S | S | R | S | S | S |
| 105 | + | female | immunology | Urine | e. coli | R | S | R | S | R | R | R | S | S | S |
| 106 | + | female | immunology | Urine | e. coli | S | R | S | S | R | S | S | S | S | S |
| 107 | + | female | immunology | Urine | e. coli | R | R | R | S | R | R | R | S | S | S |
| 108 | + | female | immunology | Urine | e. coli | R | S | S | S | R | S | R | S | S | S |
| 109 | + | female | immunology | Urine | e. coli | R | R | R | R | S | S | R | R | S | S |
| 110 | + | female | immunology | Urine | e. coli | R | R | S | R | R | S | S | S | S | S |
| 111 | + | female | immunology | Urine | e. coli | R | R | R | S | S | R | R | S | S | S |
| 112 | + | female | immunology | Urine | e. coli | R | S | R | S | S | S | R | S | S | S |
| 113 | + | female | immunology | Urine | e. coli | R | R | S | S | R | S | S | S | S | S |
| 114 | + | female | immunology | Urine | e. coli | R | S | R | S | R | R | R | S | S | S |
| 115 | + | female | immunology | Urine | e. coli | S | R | S | S | S | S | R | S | S | S |
| 116 | + | female | immunology | Urine | e. coli | R | S | R | S | R | R | R | S | S | S |
| 117 | + | female | immunology | Urine | e. coli | R | R | R | R | S | S | S | S | S | S |
| 118 | + | female | immunology | Urine | e. coli | R | R | R | S | R | S | R | S | S | S |
| 119 | + | female | immunology | Urine | e. coli | R | S | R | S | S | S | R | R | S | S |

|     |   |        |            |                 |         |   |   |   |   |   |   |   |   |   |   |   |
|-----|---|--------|------------|-----------------|---------|---|---|---|---|---|---|---|---|---|---|---|
| 120 | + | male   | immunology | Urine           | e. coli | S | R | S | S | R | R | R | R | S | S | S |
| 121 | + | female | immunology | Urine           | e. coli | R | R | R | S | S | S | S | S | S | S | S |
| 122 | + | female | immunology | Urine           | e. coli | R | S | R | S | S | S | R | R | S | S | S |
| 123 | + | female | immunology | Urine           | e. coli | R | R | S | R | R | R | R | R | S | S | S |
| 124 | + | female | immunology | Urine           | e. coli | S | S | R | S | S | S | S | S | S | S | S |
| 125 | + | female | immunology | Urine           | e. coli | R | R | R | S | R | R | R | R | S | S | S |
| 126 | + | female | immunology | Urine           | e. coli | R | S | S | S | R | S | R | R | S | S | S |
| 127 | + | female | immunology | Urine           | e. coli | R | R | R | S | S | S | S | S | S | S | S |
| 128 | + | female | immunology | Urine           | e. coli | S | S | R | S | R | R | R | R | S | S | S |
| 129 | + | female | immunology | Urine           | e. coli | R | R | S | S | S | S | R | R | S | S | S |
| 130 | + | female | immunology | Urine           | e. coli | R | R | R | S | S | S | R | R | S | S | S |
| 131 | + | female | immunology | Urine           | e. coli | R | S | R | R | R | R | S | S | S | S | S |
| 132 | + | female | immunology | Urine           | e. coli | S | R | S | S | R | S | S | S | S | S | S |
| 133 | + | female | immunology | Urine           | e. coli | R | R | R | S | S | R | R | R | S | S | S |
| 134 | + | female | immunology | Urine           | e. coli | R | S | R | S | R | S | R | R | S | S | S |
| 135 | + | female | immunology | Urine           | e. coli | R | R | R | S | S | S | R | R | R | R | R |
| 136 | + | female | immunology | Urine           | e. coli | S | R | S | S | R | R | R | R | S | S | S |
| 137 | + | female | immunology | Urine           | e. coli | R | R | R | R | S | S | S | S | S | S | S |
| 138 | + | female | immunology | Urine           | e. coli | R | S | R | S | R | S | R | R | R | S | S |
| 139 | + | female | immunology | Urine           | e. coli | R | R | S | S | S | S | R | R | S | S | S |
| 140 | + | female | immunology | Urine           | e. coli | S | S | R | S | R | S | R | R | S | S | S |
| 141 | + | female | immunology | Urine           | e. coli | R | R | R | S | R | S | S | S | S | S | S |
| 142 | + | female | immunology | Urine           | e. coli | R | S | R | S | S | S | R | R | S | S | S |
| 143 | + | female | immunology | Urine           | e. coli | S | R | S | S | S | R | R | R | S | S | S |
| 144 | + | female | immunology | Urine           | e. coli | S | S | S | S | R | S | S | S | S | S | S |
| 145 | + | female | immunology | Urine           | e. coli | R | R | R | S | S | S | R | R | R | S | S |
| 146 | + | female | immunology | Urine           | e. coli | R | S | R | R | R | S | R | R | S | S | S |
| 147 | + | female | immunology | Urine           | e. coli | R | R | S | S | R | R | R | S | R | S | S |
| 148 | + | female | immunology | Urine           | e. coli | S | S | R | S | S | S | R | R | S | S | S |
| 149 | + | female | immunology | Urine           | e. coli | R | R | R | S | R | R | R | S | S | S | S |
| 150 | + | female | immunology | Urine           | e. coli | S | S | R | S | S | S | R | R | S | S | S |
| 151 | + | female | immunology | Urine           | e. coli | R | R | S | S | R | S | R | R | S | S | S |
| 152 | + | female | immunology | Urine           | e. coli | R | S | R | S | S | R | S | S | S | S | S |
| 153 | + | female | immunology | Urine           | e. coli | R | R | S | S | S | S | R | R | S | S | S |
| 154 | + | female | immunology | Urine           | e. coli | S | S | R | S | R | S | S | R | R | S | S |
| 155 | + | female | immunology | Urine           | e. coli | R | R | S | R | R | S | R | R | S | S | S |
| 156 | + | female | immunology | Urine           | e. coli | S | S | R | S | S | S | R | R | S | S | S |
| 157 | + | female | immunology | Urine           | e. coli | R | R | S | S | R | R | R | R | R | R | R |
| 158 | + | female | immunology | Urine           | e. coli | R | S | S | S | S | S | R | R | S | S | S |
| 159 | + | female | immunology | Urine           | e. coli | R | R | R | S | R | S | R | R | S | S | S |
| 160 | + | female | immunology | Urine           | e. coli | S | R | S | S | S | R | S | R | S | S | S |
| 161 | + | female | immunology | Urine           | e. coli | R | S | R | S | R | S | R | R | S | S | S |
| 162 | + | female | immunology | Urine           | e. coli | R | R | R | S | S | R | R | R | S | S | S |
| 163 | + | female | immunology | Urine           | e. coli | R | R | S | S | S | R | R | R | R | S | S |
| 164 | + | female | immunology | Urine           | e. coli | S | S | R | S | R | S | R | R | S | S | S |
| 165 | + | female | immunology | Urine           | e. coli | R | R | S | S | S | S | R | R | S | S | S |
| 166 | + | female | immunology | Urine           | e. coli | R | R | S | S | R | R | R | R | S | S | S |
| 167 | + | female | immunology | Urine           | e. coli | R | R | R | S | R | S | S | R | R | S | S |
| 168 | + | female | immunology | Urine           | e. coli | R | S | R | S | S | S | R | R | S | S | S |
| 169 | + | female | immunology | Urine           | e. coli | R | R | S | S | R | R | R | R | S | S | S |
| 170 | + | female | immunology | Urine           | e. coli | S | S | R | S | S | S | R | R | S | S | S |
| 171 | + | female | immunology | Wound secretion | e. coli | R | R | R | S | S | S | R | R | R | S | S |
| 172 | + | female | immunology | Wound secretion | e. coli | R | S | S | S | R | R | R | R | S | S | S |
| 173 | + | female | immunology | Wound secretion | e. coli | S | R | S | S | S | S | R | R | S | S | S |
| 174 | + | female | immunology | Wound secretion | e. coli | R | R | R | S | R | S | S | S | S | S | S |
| 175 | + | female | immunology | Wound secretion | e. coli | R | S | S | S | R | R | R | R | S | S | S |
| 176 | + | female | immunology | Wound secretion | e. coli | R | R | R | S | S | S | R | R | S | S | S |
| 177 | + | female | immunology | Wound secretion | e. coli | R | S | S | S | R | S | R | R | R | S | S |
| 178 | + | female | immunology | Wound secretion | e. coli | R | R | S | S | S | R | R | R | S | S | S |
| 179 | + | female | immunology | Wound secretion | e. coli | S | S | R | S | R | S | R | R | S | S | S |
| 180 | + | female | immunology | Wound secretion | e. coli | R | R | S | S | S | R | R | R | S | S | S |

|     |   |        |            |       |         |   |   |   |   |   |   |   |   |   |   |
|-----|---|--------|------------|-------|---------|---|---|---|---|---|---|---|---|---|---|
| 181 | + | female | immunology | Pus   | e. coli | S | R | R | S | R | S | R | R | S | S |
| 182 | + | female | immunology | Pus   | e. coli | R | S | S | S | S | R | R | S | S | S |
| 183 | + | female | immunology | Pus   | e. coli | R | R | S | S | R | S | R | S | S | S |
| 184 | + | female | immunology | Pus   | e. coli | R | R | S | S | R | R | R | S | S | S |
| 185 | + | female | immunology | Blood | e. coli | S | S | R | S | S | S | R | S | S | S |
| 186 | + | female | immunology | Blood | e. coli | R | R | S | S | S | S | R | R | S | S |
| 187 | + | female | immunology | Blood | e. coli | R | R | R | S | R | R | R | S | S | S |
| 188 | + | female | immunology | Blood | e. coli | R | S | S | S | S | S | R | S | S | S |
| 189 | + | female | immunology | Blood | e. coli | S | R | S | S | R | S | R | S | S | S |
| 190 | + | female | immunology | Blood | e. coli | R | S | R | S | S | R | R | S | S | S |
| 191 | + | female | immunology | Blood | e. coli | R | R | S | S | R | S | R | S | S | S |
| 192 | + | female | immunology | Blood | e. coli | R | S | S | S | S | S | R | S | S | S |
| 193 | + | female | immunology | Blood | e. coli | S | R | R | S | R | R | R | R | S | S |
| 194 | + | female | immunology | Blood | e. coli | R | R | S | S | R | S | R | S | S | S |
| 195 | + | female | immunology | Blood | e. coli | S | S | R | S | S | S | R | S | S | S |
| 196 | + | female | immunology | Blood | e. coli | R | R | S | S | R | S | R | S | S | S |
| 197 | + | male   | immunology | Blood | e. coli | S | R | R | S | S | R | R | S | S | S |
| 198 | + | female | immunology | Blood | e. coli | R | S | S | S | R | S | R | S | S | S |
| 199 | + | female | immunology | Blood | e. coli | R | R | R | S | S | S | R | S | S | S |
| 200 | + | female | immunology | Blood | e. coli | R | S | S | S | R | R | R | R | S | S |
| 201 | + | female | immunology | Blood | e. coli | R | R | R | S | R | S | R | S | S | S |
| 202 | + | male   | immunology | Blood | e. coli | S | S | S | S | R | R | R | S | S | S |
| 203 | + | female | immunology | Blood | e. coli | R | R | R | S | S | R | R | R | S | S |
| 204 | + | female | immunology | Blood | e. coli | R | R | R | S | R | S | R | S | S | S |
| 205 | + | female | immunology | Blood | e. coli | R | S | R | S | R | R | R | S | S | S |
| 206 | + | female | immunology | Blood | e. coli | R | R | S | S | R | S | R | S | S | S |
| 207 | + | female | immunology | Blood | e. coli | S | R | R | S | R | R | R | S | S | S |
| 208 | + | female | immunology | Blood | e. coli | R | S | R | S | S | S | R | S | S | S |
| 209 | + | female | immunology | Blood | e. coli | R | R | S | S | R | R | R | S | S | S |
| 210 | + | female | immunology | Blood | e. coli | R | S | R | S | S | S | R | S | S | S |
| 211 | + | female | immunology | Blood | e. coli | S | R | S | S | S | R | R | S | S | S |
| 212 | + | female | immunology | Blood | e. coli | R | R | R | S | R | S | R | S | S | S |

Supplemental table 5

| Number | ESBL     | Gender | Department | Sample distribution | Bacteria | Number of risks | Ampicillin | Piperacillin | Ampicillin-sulbactam | Piperacillin-tazobactam | Ciprofloxacin | Levofloxacin | cefuroxime |
|--------|----------|--------|------------|---------------------|----------|-----------------|------------|--------------|----------------------|-------------------------|---------------|--------------|------------|
| 1      | negative | female | immunology | sputum              | e. coli  | 1               | S          | S            | S                    | S                       | S             | S            | S          |
| 2      | negative | female | immunology | sputum              | e. coli  | 3               | R          | S            | S                    | S                       | R             | R            | S          |
| 3      | negative | female | immunology | sputum              | e. coli  | 4               | R          | R            | R                    | S                       | S             | R            | S          |
| 4      | negative | female | immunology | sputum              | e. coli  | 7               | R          | R            | S                    | S                       | R             | S            | R          |
| 5      | negative | female | immunology | sputum              | e. coli  | 1               | S          | S            | S                    | S                       | R             | R            | S          |
| 6      | negative | female | immunology | sputum              | e. coli  | 0               | R          | R            | R                    | S                       | S             | S            | S          |
| 7      | negative | female | immunology | sputum              | e. coli  | 5               | R          | R            | S                    | S                       | S             | R            | S          |
| 8      | negative | female | immunology | sputum              | e. coli  | 1               | S          | S            | S                    | S                       | S             | S            | R          |
| 9      | negative | female | immunology | sputum              | e. coli  | 3               | R          | R            | R                    | S                       | R             | R            | S          |
| 10     | negative | male   | immunology | sputum              | e. coli  | 7               | S          | R            | S                    | S                       | S             | S            | S          |
| 11     | negative | female | immunology | sputum              | e. coli  | 0               | R          | R            | S                    | S                       | R             | R            | R          |
| 12     | negative | female | immunology | sputum              | e. coli  | 8               | R          | R            | R                    | S                       | R             | S            | S          |
| 13     | negative | female | immunology | sputum              | e. coli  | 3               | S          | S            | S                    | S                       | S             | R            | R          |
| 14     | negative | female | immunology | sputum              | e. coli  | 4               | R          | R            | R                    | S                       | S             | R            | S          |
| 15     | negative | female | immunology | sputum              | e. coli  | 1               | R          | R            | S                    | S                       | R             | S            | S          |
| 16     | negative | female | immunology | sputum              | e. coli  | 9               | S          | S            | S                    | S                       | R             | R            | S          |
| 17     | negative | female | immunology | sputum              | e. coli  | 3               | R          | R            | R                    | S                       | S             | S            | R          |
| 18     | negative | female | immunology | sputum              | e. coli  | 5               | R          | R            | S                    | S                       | R             | R            | S          |
| 19     | negative | female | immunology | sputum              | e. coli  | 0               | R          | R            | R                    | S                       | S             | S            | S          |
| 20     | negative | female | immunology | sputum              | e. coli  | 7               | S          | S            | S                    | S                       | S             | R            | S          |
| 21     | negative | female | immunology | sputum              | e. coli  | 3               | R          | R            | R                    | S                       | R             | S            | R          |
| 22     | negative | female | immunology | sputum              | e. coli  | 4               | R          | R            | S                    | S                       | S             | S            | S          |
| 23     | negative | female | immunology | sputum              | e. coli  | 1               | R          | R            | S                    | S                       | R             | R            | S          |
| 24     | negative | female | immunology | sputum              | e. coli  | 3               | S          | S            | S                    | S                       | R             | R            | S          |
| 25     | negative | female | immunology | sputum              | e. coli  | 5               | R          | R            | R                    | S                       | S             | S            | R          |
| 26     | negative | female | immunology | sputum              | e. coli  | 0               | R          | S            | S                    | S                       | R             | R            | S          |
| 27     | negative | female | immunology | sputum              | e. coli  | 4               | R          | R            | R                    | S                       | S             | S            | S          |
| 28     | negative | female | immunology | sputum              | e. coli  | 1               | S          | S            | S                    | S                       | S             | R            | R          |
| 29     | negative | male   | immunology | sputum              | e. coli  | 1               | R          | R            | R                    | S                       | R             | R            | S          |
| 30     | negative | female | immunology | sputum              | e. coli  | 8               | R          | R            | S                    | S                       | R             | R            | S          |
| 31     | negative | female | immunology | sputum              | e. coli  | 2               | R          | R            | R                    | S                       | S             | S            | R          |
| 32     | negative | female | immunology | sputum              | e. coli  | 3               | S          | S            | S                    | S                       | R             | R            | S          |
| 33     | negative | female | immunology | sputum              | e. coli  | 4               | R          | R            | R                    | S                       | S             | S            | S          |
| 34     | negative | female | immunology | sputum              | e. coli  | 7               | R          | R            | S                    | S                       | S             | R            | R          |
| 35     | negative | female | immunology | ETA                 | e. coli  | 2               | R          | R            | S                    | S                       | R             | S            | S          |
| 36     | negative | female | immunology | ETA                 | e. coli  | 0               | R          | R            | R                    | S                       | R             | R            | S          |
| 37     | negative | female | immunology | ETA                 | e. coli  | 3               | S          | S            | S                    | S                       | S             | S            | R          |
| 38     | negative | female | immunology | ETA                 | e. coli  | 5               | R          | R            | R                    | S                       | S             | R            | S          |
| 39     | negative | female | immunology | ETA                 | e. coli  | 1               | R          | S            | S                    | S                       | R             | S            | S          |
| 40     | negative | female | immunology | ETA                 | e. coli  | 2               | S          | S            | S                    | S                       | R             | R            | R          |
| 41     | negative | female | immunology | BALF                | e. coli  | 0               | R          | R            | S                    | S                       | R             | R            | S          |
| 42     | negative | female | immunology | BALF                | e. coli  | 3               | R          | R            | S                    | S                       | S             | S            | S          |
| 43     | negative | female | immunology | BALF                | e. coli  | 2               | R          | R            | R                    | S                       | S             | R            | R          |
| 44     | negative | female | immunology | BALF                | e. coli  | 4               | R          | R            | S                    | S                       | R             | S            | S          |
| 45     | negative | female | immunology | BALF                | e. coli  | 1               | R          | R            | S                    | S                       | S             | R            | S          |
| 46     | negative | male   | immunology | BALF                | e. coli  | 7               | R          | R            | S                    | S                       | S             | S            | R          |
| 47     | negative | female | immunology | BALF                | e. coli  | 2               | R          | R            | R                    | S                       | R             | R            | S          |
| 48     | negative | female | immunology | BALF                | e. coli  | 0               | S          | S            | S                    | S                       | R             | S            | S          |
| 49     | negative | female | immunology | BALF                | e. coli  | 4               | R          | R            | R                    | S                       | S             | R            | R          |
| 50     | negative | female | immunology | BALF                | e. coli  | 4               | R          | R            | R                    | S                       | R             | S            | S          |
| 51     | negative | female | immunology | BALF                | e. coli  | 2               | R          | R            | S                    | S                       | S             | R            | S          |

|     |          |        |            |       |         |   |   |   |   |   |   |   |   |
|-----|----------|--------|------------|-------|---------|---|---|---|---|---|---|---|---|
| 52  | negative | female | immunology | BALF  | e. coli | 8 | R | R | R | S | S | R | R |
| 53  | negative | female | immunology | BALF  | e. coli | 3 | S | S | S | S | S | S | S |
| 54  | negative | female | immunology | BALF  | e. coli | 4 | R | R | R | S | R | R | S |
| 55  | negative | female | immunology | Urine | e. coli | 2 | R | S | S | S | S | S | R |
| 56  | negative | female | immunology | Urine | e. coli | 0 | R | R | R | S | S | R | S |
| 57  | negative | female | immunology | Urine | e. coli | 5 | S | S | S | S | R | R | R |
| 58  | negative | female | immunology | Urine | e. coli | 1 | R | R | R | S | S | S | S |
| 59  | negative | male   | immunology | Urine | e. coli | 3 | R | R | S | S | S | R | S |
| 60  | negative | female | immunology | Urine | e. coli | 2 | R | R | R | S | R | R | R |
| 61  | negative | female | immunology | Urine | e. coli | 4 | S | S | S | S | S | S | S |
| 62  | negative | female | immunology | Urine | e. coli | 2 | R | R | R | S | R | R | S |
| 63  | negative | female | immunology | Urine | e. coli | 4 | R | R | S | S | S | R | R |
| 64  | negative | female | immunology | Urine | e. coli | 1 | S | S | S | S | R | R | S |
| 65  | negative | female | immunology | Urine | e. coli | 3 | R | R | R | S | S | S | S |
| 66  | negative | female | immunology | Urine | e. coli | 0 | S | R | S | S | R | R | R |
| 67  | negative | female | immunology | Urine | e. coli | 3 | R | R | R | S | S | S | S |
| 68  | negative | female | immunology | Urine | e. coli | 2 | R | R | R | S | S | R | S |
| 69  | negative | female | immunology | Urine | e. coli | 6 | R | R | R | S | R | R | R |
| 70  | negative | female | immunology | Urine | e. coli | 2 | S | S | S | S | S | R | S |
| 71  | negative | female | immunology | Urine | e. coli | 7 | R | R | R | S | R | R | R |
| 72  | negative | female | immunology | Urine | e. coli | 3 | R | R | R | S | S | R | S |
| 73  | negative | female | immunology | Urine | e. coli | 3 | S | S | S | S | S | S | S |
| 74  | negative | female | immunology | Urine | e. coli | 2 | R | R | R | S | R | R | S |
| 75  | negative | female | immunology | Urine | e. coli | 0 | R | R | R | S | S | R | R |
| 76  | negative | female | immunology | Urine | e. coli | 1 | S | S | S | S | S | R | S |
| 77  | negative | female | immunology | Urine | e. coli | 2 | R | R | R | S | R | R | S |
| 78  | negative | female | immunology | Urine | e. coli | 6 | R | R | R | S | S | S | S |
| 79  | negative | female | immunology | Urine | e. coli | 3 | S | S | S | S | R | R | R |
| 80  | negative | female | immunology | Urine | e. coli | 2 | R | R | R | S | S | R | S |
| 81  | negative | male   | immunology | Urine | e. coli | 6 | R | R | R | S | R | S | S |
| 82  | negative | female | immunology | Urine | e. coli | 2 | R | R | R | S | S | R | R |
| 83  | negative | female | immunology | Urine | e. coli | 3 | S | S | S | S | S | R | S |
| 84  | negative | female | immunology | Urine | e. coli | 0 | R | R | R | S | R | S | S |
| 85  | negative | female | immunology | Urine | e. coli | 6 | R | R | S | S | S | R | R |
| 86  | negative | female | immunology | Urine | e. coli | 2 | S | R | S | S | R | R | S |
| 87  | negative | female | immunology | Urine | e. coli | 1 | R | R | R | S | S | S | S |
| 88  | negative | female | immunology | Urine | e. coli | 3 | R | R | S | S | R | R | S |
| 89  | negative | female | immunology | Urine | e. coli | 2 | R | R | R | S | R | R | R |
| 90  | negative | female | immunology | Urine | e. coli | 6 | S | S | S | S | S | R | S |
| 91  | negative | female | immunology | Urine | e. coli | 3 | R | R | R | S | R | S | S |
| 92  | negative | female | immunology | Urine | e. coli | 4 | R | R | S | S | S | R | S |
| 93  | negative | female | immunology | Urine | e. coli | 2 | S | S | S | S | R | R | R |
| 94  | negative | female | immunology | Urine | e. coli | 0 | R | R | R | S | S | S | S |
| 95  | negative | female | immunology | Urine | e. coli | 7 | R | R | S | S | R | R | S |
| 96  | negative | male   | immunology | Urine | e. coli | 3 | S | R | S | S | S | R | S |
| 97  | negative | female | immunology | Urine | e. coli | 1 | R | R | R | S | R | S | S |
| 98  | negative | female | immunology | Urine | e. coli | 4 | R | R | R | S | S | R | R |
| 99  | negative | female | immunology | Urine | e. coli | 2 | S | S | S | S | R | R | S |
| 100 | negative | female | immunology | Urine | e. coli | 3 | R | R | R | S | S | S | S |
| 101 | negative | female | immunology | Urine | e. coli | 9 | R | R | R | S | R | R | S |
| 102 | negative | female | immunology | Urine | e. coli | 2 | S | S | S | S | S | R | R |
| 103 | negative | female | immunology | Urine | e. coli | 3 | R | R | S | S | S | S | S |
| 104 | negative | female | immunology | Urine | e. coli | 4 | R | R | R | S | R | R | S |

|     |          |        |            |                 |         |   |   |   |   |   |   |   |   |
|-----|----------|--------|------------|-----------------|---------|---|---|---|---|---|---|---|---|
| 105 | negative | female | immunology | Urine           | e. coli | 0 | S | S | S | S | S | R | R |
| 106 | negative | female | immunology | Urine           | e. coli | 2 | R | S | S | S | R | R | S |
| 107 | negative | female | immunology | Urine           | e. coli | 3 | R | R | R | S | S | S | R |
| 108 | negative | female | immunology | Urine           | e. coli | 1 | R | S | S | S | R | R | S |
| 109 | negative | female | immunology | Urine           | e. coli | 6 | S | R | R | S | S | R | R |
| 110 | negative | female | immunology | Urine           | e. coli | 3 | R | S | S | S | S | S | S |
| 111 | negative | female | immunology | Urine           | e. coli | 7 | R | R | R | S | S | S | S |
| 112 | negative | female | immunology | Urine           | e. coli | 2 | R | R | S | S | R | R | R |
| 113 | negative | female | immunology | Urine           | e. coli | 1 | S | S | S | S | S | S | S |
| 114 | negative | female | immunology | Urine           | e. coli | 3 | R | R | R | S | R | R | S |
| 115 | negative | female | immunology | Urine           | e. coli | 2 | R | R | R | S | S | R | S |
| 116 | negative | female | immunology | Urine           | e. coli | 0 | S | S | S | S | S | S | R |
| 117 | negative | female | immunology | Urine           | e. coli | 3 | R | R | S | S | R | R | S |
| 118 | negative | male   | immunology | Urine           | e. coli | 6 | R | R | R | S | S | R | S |
| 119 | negative | female | immunology | Urine           | e. coli | 2 | R | R | R | S | R | S | S |
| 120 | negative | female | immunology | Urine           | e. coli | 7 | S | S | S | S | S | R | R |
| 121 | negative | female | immunology | Urine           | e. coli | 3 | R | R | S | S | S | R | S |
| 122 | negative | female | immunology | Urine           | e. coli | 1 | R | R | R | S | R | R | S |
| 123 | negative | female | immunology | Urine           | e. coli | 3 | R | R | R | S | S | S | S |
| 124 | negative | female | immunology | Urine           | e. coli | 2 | S | S | S | S | R | R | R |
| 125 | negative | female | immunology | Urine           | e. coli | 1 | R | R | S | S | S | R | S |
| 126 | negative | female | immunology | Urine           | e. coli | 4 | R | R | R | S | R | S | S |
| 127 | negative | female | immunology | Urine           | e. coli | 3 | R | R | S | S | S | R | R |
| 128 | negative | female | immunology | Urine           | e. coli | 2 | S | S | S | S | R | S | R |
| 129 | negative | female | immunology | Urine           | e. coli | 7 | R | S | S | S | S | S | S |
| 130 | negative | female | immunology | Urine           | e. coli | 0 | R | R | R | S | R | S | R |
| 131 | negative | female | immunology | Urine           | e. coli | 3 | R | R | R | S | S | R | S |
| 132 | negative | female | immunology | Urine           | e. coli | 2 | S | S | S | S | R | S | S |
| 133 | negative | female | immunology | Urine           | e. coli | 3 | R | R | R | S | S | R | R |
| 134 | negative | female | immunology | Urine           | e. coli | 2 | R | R | S | S | R | S | S |
| 135 | negative | female | immunology | Wound secretion | e. coli | 1 | R | R | R | S | S | S | R |
| 136 | negative | female | immunology | Wound secretion | e. coli | 4 | S | S | S | S | R | R | R |
| 137 | negative | female | immunology | Wound secretion | e. coli | 3 | R | R | R | S | S | R | S |
| 138 | negative | female | immunology | Wound secretion | e. coli | 2 | R | S | S | S | R | S | S |
| 139 | negative | female | immunology | Wound secretion | e. coli | 5 | R | R | R | S | S | S | R |
| 140 | negative | female | immunology | Wound secretion | e. coli | 1 | S | S | S | S | R | R | S |
| 141 | negative | female | immunology | Wound secretion | e. coli | 3 | R | R | R | S | S | S | R |
| 142 | negative | female | immunology | Wound secretion | e. coli | 2 | R | R | S | S | R | R | S |
| 143 | negative | female | immunology | Wound secretion | e. coli | 0 | R | R | S | S | S | S | R |
| 144 | negative | female | immunology | Wound secretion | e. coli | 5 | S | S | S | S | R | R | S |
| 145 | negative | male   | immunology | Pus             | e. coli | 1 | R | R | R | S | S | S | R |
| 146 | negative | female | immunology | Pus             | e. coli | 3 | R | R | S | S | R | R | S |
| 147 | negative | female | immunology | Pus             | e. coli | 2 | R | R | R | S | S | R | R |
| 148 | negative | female | immunology | Pus             | e. coli | 4 | S | S | S | S | R | S | S |
| 149 | negative | female | immunology | Blood           | e. coli | 0 | R | R | R | S | S | R | R |
| 150 | negative | female | immunology | Blood           | e. coli | 3 | R | R | S | S | R | S | S |
| 151 | negative | female | immunology | Blood           | e. coli | 5 | S | S | S | S | S | R | S |
| 152 | negative | female | immunology | Blood           | e. coli | 2 | R | R | R | S | R | S | R |
| 153 | negative | female | immunology | Blood           | e. coli | 4 | R | R | R | S | S | R | S |
| 154 | negative | female | immunology | Blood           | e. coli | 3 | S | S | S | S | R | S | R |
| 155 | negative | female | immunology | Blood           | e. coli | 5 | R | R | R | S | S | R | S |
| 156 | negative | female | immunology | Blood           | e. coli | 2 | R | R | S | S | R | S | S |
| 157 | negative | female | immunology | Blood           | e. coli | 7 | S | S | S | S | R | R | R |

|     |          |        |            |       |         |   |   |   |   |   |   |   |   |
|-----|----------|--------|------------|-------|---------|---|---|---|---|---|---|---|---|
| 158 | negative | female | immunology | Blood | e. coli | 5 | R | R | R | S | S | S | S |
| 159 | negative | female | immunology | Blood | e. coli | 2 | R | S | S | S | R | R | S |
| 160 | negative | female | immunology | Blood | e. coli | 4 | R | R | R | S | S | S | R |
| 161 | negative | female | immunology | Blood | e. coli | 3 | S | S | S | S | R | R | S |
| 162 | negative | female | immunology | Blood | e. coli | 5 | R | R | R | S | R | S | S |
| 163 | negative | female | immunology | Blood | e. coli | 0 | R | R | S | S | S | R | S |
| 164 | negative | female | immunology | Blood | e. coli | 7 | R | S | S | S | R | S | R |
| 165 | negative | female | immunology | Blood | e. coli | 3 | R | R | R | S | R | R | S |
| 166 | negative | female | immunology | Blood | e. coli | 2 | S | S | S | S | R | S | S |
| 167 | negative | female | immunology | Blood | e. coli | 4 | R | R | R | S | R | R | R |
| 168 | negative | male   | immunology | Blood | e. coli | 3 | R | R | R | S | S | R | S |
| 169 | negative | female | immunology | Blood | e. coli | 6 | R | S | S | S | R | R | R |
| 170 | negative | female | immunology | Blood | e. coli | 3 | R | R | S | S | R | S | S |
| 171 | negative | female | immunology | Blood | e. coli | 5 | R | R | R | S | R | R | S |
| 172 | negative | female | immunology | Blood | e. coli | 2 | R | S | S | S | S | S | R |

Supplemental table 6

| Number | ESBL     | Gender | Department | Sample distribution | Bacteria | ceftazidime | cefepime | Aztreonam | Amikacin | Gentamicin | Fosfomycin | Trimethoprim-sulfamethoxazole | Ertapenem | Meropenem | Imipenem |
|--------|----------|--------|------------|---------------------|----------|-------------|----------|-----------|----------|------------|------------|-------------------------------|-----------|-----------|----------|
| 1      | negative | female | immunology | sputum              | e. coli  | S           | R        | S         | S        | R          | S          | S                             | S         | S         | S        |
| 2      | negative | female | immunology | sputum              | e. coli  | S           | S        | S         | S        | S          | S          | R                             | S         | S         | S        |
| 3      | negative | female | immunology | sputum              | e. coli  | S           | S        | S         | S        | S          | S          | S                             | S         | S         | S        |
| 4      | negative | female | immunology | sputum              | e. coli  | S           | S        | S         | S        | S          | S          | R                             | S         | S         | S        |
| 5      | negative | female | immunology | sputum              | e. coli  | S           | S        | S         | S        | R          | S          | S                             | S         | S         | S        |
| 6      | negative | female | immunology | sputum              | e. coli  | S           | S        | S         | S        | S          | S          | S                             | S         | S         | S        |
| 7      | negative | female | immunology | sputum              | e. coli  | S           | S        | S         | S        | R          | S          | R                             | S         | S         | S        |
| 8      | negative | female | immunology | sputum              | e. coli  | S           | S        | S         | R        | R          | S          | S                             | S         | S         | S        |
| 9      | negative | female | immunology | sputum              | e. coli  | S           | R        | S         | S        | S          | S          | R                             | S         | S         | S        |
| 10     | negative | male   | immunology | sputum              | e. coli  | S           | S        | S         | S        | S          | S          | S                             | S         | S         | S        |
| 11     | negative | female | immunology | sputum              | e. coli  | S           | S        | S         | S        | S          | S          | S                             | S         | S         | S        |
| 12     | negative | female | immunology | sputum              | e. coli  | S           | S        | S         | S        | R          | S          | R                             | S         | S         | S        |
| 13     | negative | female | immunology | sputum              | e. coli  | S           | S        | S         | S        | S          | S          | S                             | S         | S         | S        |
| 14     | negative | female | immunology | sputum              | e. coli  | S           | S        | S         | S        | S          | S          | R                             | S         | S         | S        |
| 15     | negative | female | immunology | sputum              | e. coli  | S           | S        | S         | S        | S          | S          | S                             | S         | S         | S        |
| 16     | negative | female | immunology | sputum              | e. coli  | S           | R        | S         | R        | R          | S          | S                             | S         | S         | S        |
| 17     | negative | female | immunology | sputum              | e. coli  | S           | S        | S         | S        | S          | S          | R                             | S         | S         | S        |
| 18     | negative | female | immunology | sputum              | e. coli  | S           | S        | S         | S        | R          | S          | S                             | S         | S         | S        |
| 19     | negative | female | immunology | sputum              | e. coli  | S           | S        | S         | S        | S          | S          | S                             | S         | S         | S        |
| 20     | negative | female | immunology | sputum              | e. coli  | S           | S        | S         | S        | S          | S          | R                             | S         | S         | S        |
| 21     | negative | female | immunology | sputum              | e. coli  | S           | S        | S         | S        | R          | S          | S                             | S         | S         | S        |
| 22     | negative | female | immunology | sputum              | e. coli  | S           | S        | S         | S        | S          | S          | S                             | S         | S         | S        |
| 23     | negative | female | immunology | sputum              | e. coli  | S           | R        | S         | S        | S          | S          | S                             | S         | S         | S        |
| 24     | negative | female | immunology | sputum              | e. coli  | S           | S        | S         | S        | S          | S          | R                             | S         | S         | S        |
| 25     | negative | female | immunology | sputum              | e. coli  | S           | S        | S         | R        | R          | S          | S                             | S         | S         | S        |
| 26     | negative | female | immunology | sputum              | e. coli  | S           | S        | S         | S        | S          | S          | R                             | S         | S         | S        |
| 27     | negative | female | immunology | sputum              | e. coli  | S           | S        | S         | S        | R          | S          | S                             | S         | S         | S        |
| 28     | negative | female | immunology | sputum              | e. coli  | S           | S        | S         | S        | S          | S          | S                             | S         | S         | S        |
| 29     | negative | male   | immunology | sputum              | e. coli  | S           | R        | S         | S        | R          | S          | R                             | S         | S         | S        |
| 30     | negative | female | immunology | sputum              | e. coli  | S           | S        | S         | S        | S          | S          | S                             | S         | S         | S        |
| 31     | negative | female | immunology | sputum              | e. coli  | S           | S        | S         | S        | R          | S          | R                             | S         | S         | S        |
| 32     | negative | female | immunology | sputum              | e. coli  | S           | S        | S         | S        | S          | S          | S                             | S         | S         | S        |
| 33     | negative | female | immunology | sputum              | e. coli  | S           | S        | S         | S        | R          | S          | S                             | S         | S         | S        |
| 34     | negative | female | immunology | sputum              | e. coli  | S           | S        | S         | S        | S          | S          | R                             | S         | S         | S        |
| 35     | negative | female | immunology | ETA                 | e. coli  | S           | R        | S         | S        | S          | S          | S                             | S         | S         | S        |
| 36     | negative | female | immunology | ETA                 | e. coli  | S           | S        | S         | S        | S          | S          | R                             | S         | S         | S        |
| 37     | negative | female | immunology | ETA                 | e. coli  | S           | S        | S         | S        | S          | S          | S                             | S         | S         | S        |
| 38     | negative | female | immunology | ETA                 | e. coli  | S           | S        | S         | S        | R          | S          | R                             | S         | S         | S        |
| 39     | negative | female | immunology | ETA                 | e. coli  | S           | S        | S         | S        | S          | S          | S                             | S         | S         | S        |
| 40     | negative | female | immunology | ETA                 | e. coli  | S           | S        | S         | S        | S          | S          | R                             | S         | S         | S        |
| 41     | negative | female | immunology | BALF                | e. coli  | S           | R        | S         | S        | R          | S          | S                             | S         | S         | S        |
| 42     | negative | female | immunology | BALF                | e. coli  | S           | S        | S         | S        | S          | S          | S                             | S         | S         | S        |
| 43     | negative | female | immunology | BALF                | e. coli  | S           | S        | S         | R        | R          | S          | R                             | S         | S         | S        |
| 44     | negative | female | immunology | BALF                | e. coli  | S           | S        | S         | S        | S          | S          | R                             | S         | S         | S        |
| 45     | negative | female | immunology | BALF                | e. coli  | S           | S        | S         | S        | S          | S          | S                             | S         | S         | S        |
| 46     | negative | male   | immunology | BALF                | e. coli  | S           | S        | S         | S        | R          | S          | R                             | S         | S         | S        |
| 47     | negative | female | immunology | BALF                | e. coli  | S           | R        | BALF      | S        | S          | S          | S                             | S         | S         | S        |
| 48     | negative | female | immunology | BALF                | e. coli  | S           | S        | S         | S        | S          | S          | S                             | S         | S         | S        |
| 49     | negative | female | immunology | BALF                | e. coli  | S           | S        | S         | S        | R          | S          | R                             | S         | S         | S        |
| 50     | negative | female | immunology | BALF                | e. coli  | S           | S        | S         | S        | S          | S          | R                             | S         | S         | S        |
| 51     | negative | female | immunology | BALF                | e. coli  | S           | S        | S         | S        | R          | S          | S                             | S         | S         | S        |







|     |          |        |            |       |         |   |   |   |   |   |   |   |   |   |   |
|-----|----------|--------|------------|-------|---------|---|---|---|---|---|---|---|---|---|---|
| 158 | negative | female | immunology | Blood | e. coli | S | S | S | S | S | S | S | S | S | S |
| 159 | negative | female | immunology | Blood | e. coli | S | S | S | S | R | S | R | S | S | S |
| 160 | negative | female | immunology | Blood | e. coli | S | S | S | S | S | S | R | S | S | S |
| 161 | negative | female | immunology | Blood | e. coli | S | S | S | S | S | S | R | S | S | S |
| 162 | negative | female | immunology | Blood | e. coli | S | S | S | S | R | S | S | S | S | S |
| 163 | negative | female | immunology | Blood | e. coli | S | S | S | S | S | S | R | S | S | S |
| 164 | negative | female | immunology | Blood | e. coli | S | S | S | S | S | S | R | S | S | S |
| 165 | negative | female | immunology | Blood | e. coli | S | S | S | S | R | S | S | S | S | S |
| 166 | negative | female | immunology | Blood | e. coli | S | S | S | S | S | S | S | S | S | S |
| 167 | negative | female | immunology | Blood | e. coli | S | R | S | S | S | S | R | S | S | S |
| 168 | negative | male   | immunology | Blood | e. coli | S | S | S | S | R | S | R | S | S | S |
| 169 | negative | female | immunology | Blood | e. coli | S | S | S | S | S | S | S | S | S | S |
| 170 | negative | female | immunology | Blood | e. coli | S | S | S | S | S | S | R | S | S | S |
| 171 | negative | female | immunology | Blood | e. coli | S | S | S | S | S | S | R | S | S | S |
| 172 | negative | female | immunology | Blood | e. coli | S | S | S | S | R | S | S | S | S | S |
